# Supplementary material for: Recommended first-line management of asymptomatic brain metastases from EGFR mutant and ALK positive non-small cell lung cancer varies significantly according to specialty: an international survey of clinical practice
Source: PubMed Central journal article supplement — J Thorac Dis. 2023 Aug 14;15(8):4367–78. doi: 10.21037/jtd-22-697 (PMC10482634; doi:10.21037/jtd-22-697), 2023-08-14
Supplement: jtd-15-08-4367-dss.pdf [file jtd-15-08-4367-dss.pdf]

## Data Sharing Statement

|                     |                                                                                                                                                    |                                                                                                                  |
|---------------------|----------------------------------------------------------------------------------------------------------------------------------------------------|------------------------------------------------------------------------------------------------------------------|
| <b>Article Info</b> | https://dx.doi.org/10.21037/jtd-22-697                                                                                                             |                                                                                                                  |
| <b>Item</b>         | <b>Question</b>                                                                                                                                    | <b>Authors' Response<br/>(place "-" if not applicable)</b>                                                       |
| 1                   | Would you like to share data collected for your study to others?                                                                                   | Yes                                                                                                              |
| 2                   | If not, would you like to share the reason for your decision?                                                                                      | -                                                                                                                |
| 3                   | What data in particular will be shared?                                                                                                            | Raw data from surveys collected.                                                                                 |
| 4                   | Any other documents will be share? Such as study protocol, statistical analysis plan, informed consent form, clinical study report, analytic code. | Survey document and consent form.                                                                                |
| 5                   | When will data availability begin?                                                                                                                 | From the publication date.                                                                                       |
| 6                   | When will data availability end?                                                                                                                   | Two years within publication date.                                                                               |
| 7                   | To whom will you share the data?                                                                                                                   | Academic oncologists treating lung cancer.                                                                       |
| 8                   | For what type of analysis or purpose?                                                                                                              | Collaboration.                                                                                                   |
| 9                   | How or where can the data/documents be obtained?                                                                                                   | By sending email to: <a href="mailto:david.shultz@rmp.uhn.ca">david.shultz@rmp.uhn.ca</a>                        |
| 10                  | Any other restrictions?                                                                                                                            | We may balance the potential benefits and risks for each request and then provide the data that could be shared. |
